# Supplementary material for: Capsaicin Analogues Derived from n-3 Polyunsaturated Fatty Acids (PUFAs) Reduce Inflammatory Activity of Macrophages and Stimulate Insulin Secretion by β-Cells In Vitro
Source: MDPI journal article supplement (doi:10.3390/nu11040915), 2019-04-24
Supplement: s1 [file s1]

**Capsaicin analogues derived from n-3 polyunsaturated fatty acids (PUFAs) reduce inflammatory activity of macrophages and stimulate insulin secretion by  $\beta$ -cells *in vitro***

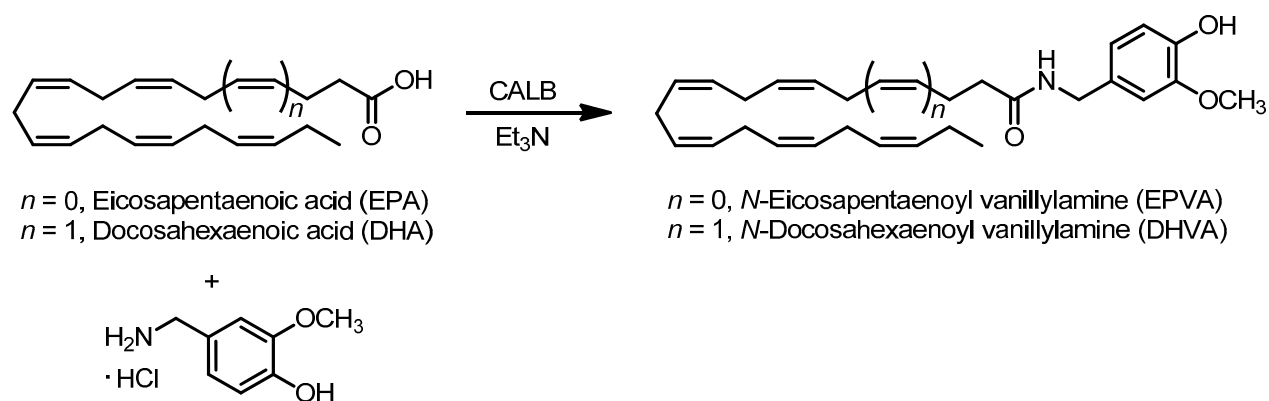

**Figure S1.** Synthesis of *N*-eicosapentaenoyl vanillylamine (EPVA) and *N*-docosahexaenoyl vanillylamine (DHVA)

**Table S1:** Effect of EPVA and DHVA on RAW 264.7 macrophages by XTT / LDH assays

| Treatment    | Concentration ( $\mu\text{M}$ ) | Viability (%) | Cytotoxicity (%) |
|--------------|---------------------------------|---------------|------------------|
| Vehicle      | -                               | 100           | 100              |
| EPVA         | 0.01                            | $116 \pm 3$   | $100 \pm 4$      |
|              | 0.1                             | $118 \pm 12$  | $105 \pm 4$      |
|              | 1.0                             | $99 \pm 7$    | $100 \pm 5$      |
|              | 2.5                             | $109 \pm 12$  | $112 \pm 9$      |
| DHVA         | 0.01                            | $119 \pm 19$  | $103 \pm 2$      |
|              | 0.1                             | $97 \pm 16$   | $100 \pm 1$      |
|              | 1.0                             | $108 \pm 11$  | $103 \pm 9$      |
|              | 2.5                             | $107 \pm 8$   | $111 \pm 6$      |
| Triton X-100 | -                               | $27 \pm 2$    | $212 \pm 6$      |

**Table S2:** Effect of EPVA and DHVA on INS-1 832/13  $\beta$ -cell line by MTT assay

| Treatment | Concentration ( $\mu\text{M}$ ) | Viability (%) |
|-----------|---------------------------------|---------------|
| Vehicle   | -                               | 100           |
| EPVA      | 1.0                             | $99 \pm 6$    |
|           | 2.5                             | $95 \pm 7$    |
| DHVA      | 1.0                             | $89 \pm 13$   |
|           | 2.5                             | $83 \pm 11$   |
